# Supplementary material
Source: HighWire-hosted journal article supplement (http://ajnr-stage2.highwire.org/highwire/filestream/89535/field_highwire_adjunct_files/0/1198.pdf)
Supplement: 1198.pdf [file 1198.pdf]

| <i>Type of Complications</i>     | <i>n. (%)</i> |
|----------------------------------|---------------|
| <i>BA Dissection</i>             | 1 (0,5)       |
| <i>BA Occlusion</i>              | 1 (0,5)       |
| <i>PH</i>                        | 20 (10,5)     |
| <i>New territory embolism</i>    | 6 (3,1)       |
| <i>Stent Occlusion</i>           | 2 (1)         |
| <i>Vessel perforation</i>        | 3 (1,5)       |
| <i>VA Dissection</i>             | 2 (1)         |
| <i>Unwanted Stent Detachment</i> | 1 (0,5)       |
| <i>Extracranial Dissection</i>   | 1 (0,5)       |
| <i>aSAH</i>                      | 3 (1,5)       |
| <i>Hydrocefalus</i>              | 1 (0,5)       |

## Supplement 1

| <i>Characteristics</i>                            |  | <i>Overall</i> | <i>Poor Outcomes at<br/>90days mRS (3-6)</i> | <i>Favorable Outcomes at<br/>90days mRS (0-2)</i> | <i>p-value</i> |
|---------------------------------------------------|--|----------------|----------------------------------------------|---------------------------------------------------|----------------|
| <i>N</i>                                          |  | <b>67</b>      | <b>52 (77.61%)</b>                           | <b>15 (22.39%)</b>                                |                |
| <i>Age</i>                                        |  | 66,68±12,82    | 67,51±12,38                                  | 63,8±14,3                                         | 0,326          |
| <i>Females</i>                                    |  | 17 (25.4%)     | 14/52 (26.9%)                                | 3/15 (20.0%)                                      | 0,587          |
| <i>Baseline NIHSS (IQR)</i>                       |  | 12 (8-18)      | 14/52 (8-19)                                 | 9/15 (6-11)                                       | <b>0,011</b>   |
| <i>CT</i>                                         |  | 53 (79.1%)     | 40/52 (76.9%)                                | 13/15 (86.7%)                                     | 0.414          |
| <i>CTA</i>                                        |  | 39 (58.2%)     | 29/52 (55.8%)                                | 10/15 (66.7%)                                     | 0,451          |
| <i>CTP</i>                                        |  | 3 (4.5%)       | 3/53 (5.8%)                                  | 0                                                 | -              |
| <i>MRI</i>                                        |  | 36 (53.7%)     | 31/53 (59.6%)                                | 5/15 (33.3%)                                      | 0,072          |
| <i>pc ASPECTS (CT)</i>                            |  | 8,71±1.48      | 8,63±1.67                                    | 8.88±1.05                                         | 0,677          |
| <i>pc ASPECTS (MRI)</i>                           |  | 6,33±1,45      | 6,25±1,45                                    | 6.8±1.45                                          | 0,447          |
| <i>Occlusion site</i>                             |  |                |                                              |                                                   | 0,213          |
| <i>BA</i>                                         |  | 57 (85.1%)     | 46/53 (88.5%)                                | 11/15 (73.3%)                                     |                |
| <i>VA</i>                                         |  | 10 (14.9%)     | 6/53 (11.5%)                                 | 4/15 (26.7)                                       |                |
| <i>WakeUpStroke</i>                               |  | 7 (10.4%)      | 3/53 (5.8%)                                  | 4/15 (26.7%)                                      | <b>0,020</b>   |
| <i>Thombolysis</i>                                |  | 12 (17.9%)     | 9/53 (17.3%)                                 | 3/15 (20.0%)                                      | 0,811          |
| <i>Contact Aspiration</i>                         |  | 26 (38.8%)     | 19/53 (36.5%)                                | 7/15 (46.7%)                                      | 0,478          |
| <i>Stentriever</i>                                |  | 13 (19.4%)     | 9/53 (17.3%)                                 | 4/15 (26.7%)                                      | 0,419          |
| <i>Combined</i>                                   |  | 18 (26.9%)     | 16/53 (30.8%)                                | 2/15 (13.3%)                                      | 0,180          |
| <i>Use of alternative thrombectomy techniques</i> |  | -              | -                                            | -                                                 | -              |
| <i>No endovascular access</i>                     |  | -              | -                                            | -                                                 | -              |
| <i>mTICI 2b/3</i>                                 |  | 52 (77.6%)     | 38/53 (73.9%)                                | 14/15 (93.3%)                                     | 0,097          |
| <i>mTICI 3</i>                                    |  | 36 (53.7%)     | 23/53 (44.2%)                                | 13/15 (86.7%)                                     | <b>0,004</b>   |
| <i>First Pass Effect mTICI 2b/3</i>               |  | 26 (38.8%)     | 17/53 (32.7%)                                | 9/15 (60.0%)                                      | 0,056          |
| <i>First Pass Effect mTICI 3</i>                  |  | 21 (31.3%)     | 12/53 (23.1%)                                | 9/15 (60.00%)                                     | <b>0,007</b>   |
| <i>LargeBore catheters</i>                        |  | 14 (20.9%)     | 10/53 (19.2%)                                | 4/15 (26.7%)                                      | 0,533          |
| <i>Symptoms-to-groin (IQR)</i>                    |  | 330 (230-455)  | 315 (220-432.5)                              | 455 (255-497)                                     | 0,167          |
| <i>Reperfusion-time (IQR)</i>                     |  | 78.5 (44-114)  | 90 (50-118)                                  | 74 (41-100)                                       | 0,347          |
| <i>Onset-to-reperfusion (IQR)</i>                 |  | 504 (370-860)  | 495 (375-836)                                | 522 (355-1130)                                    | 0,629          |

| <i>var.</i>                      | <i>OR</i> | <i>95% CI</i> | <i>p-value</i> |
|----------------------------------|-----------|---------------|----------------|
| <i>NIHSS baseline</i>            | 0,86      | 0,75-0,98     | <b>0,027</b>   |
| <i>mTICI 3</i>                   | 4.44      | 0,60-32.47    | 0,141          |
| <i>First-pass effect mTICI 3</i> | 3,17      | 0,59-16.96    | 0,177          |

**Supplement 2 B**

Successfully reperfused (mTICI2b3) patients' MRI pc-ASPECTS

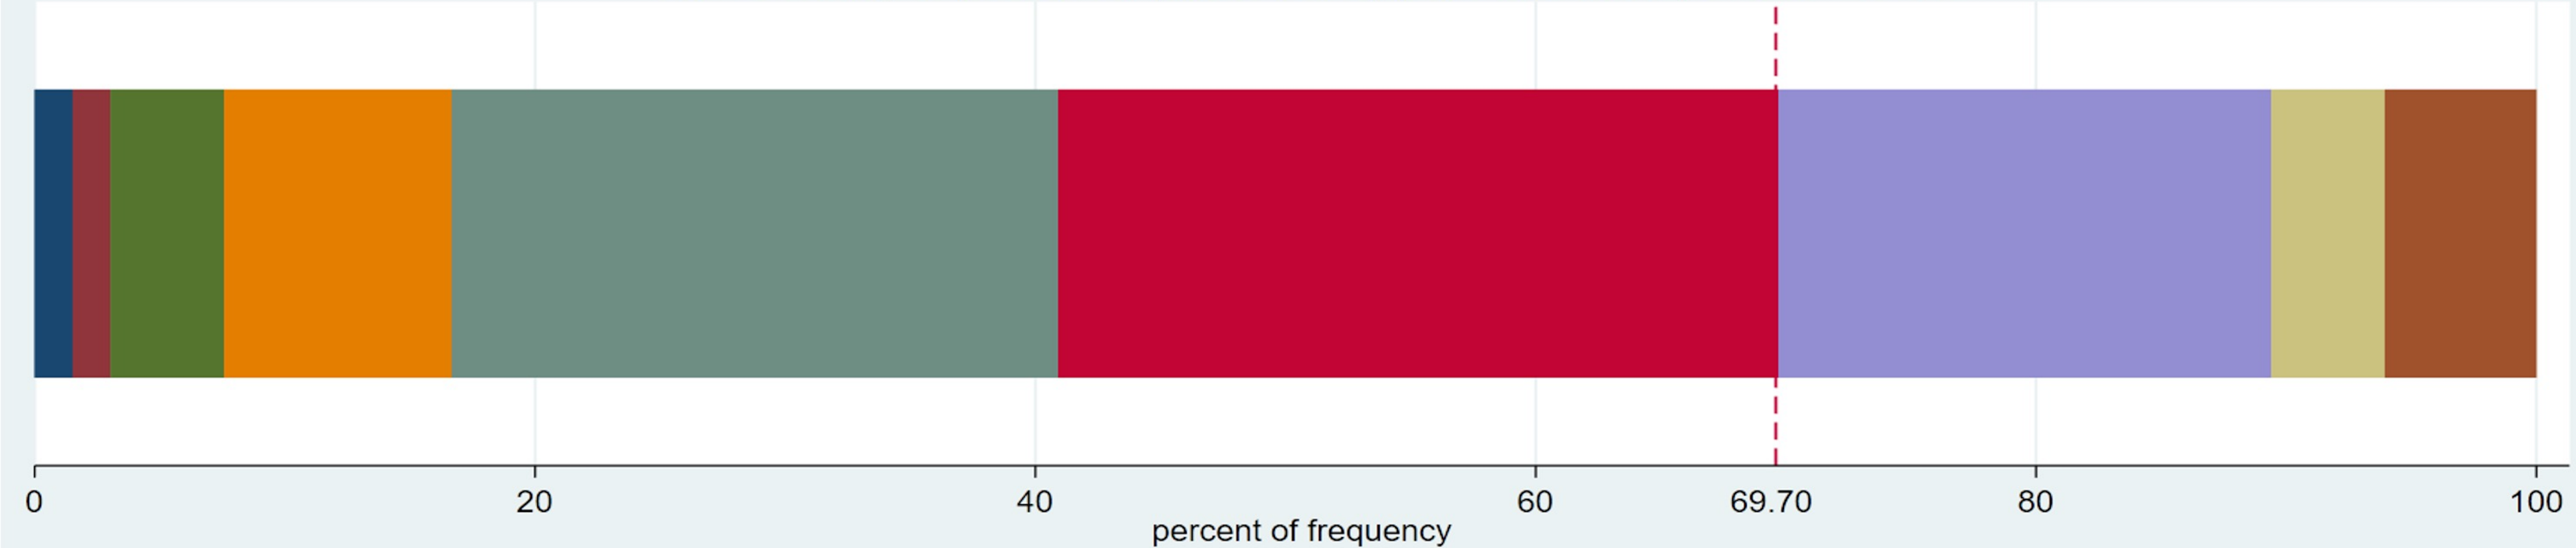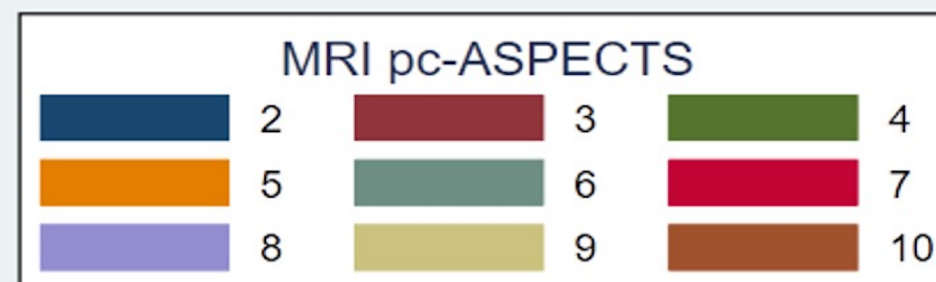

## Reperfusion time according to etiology

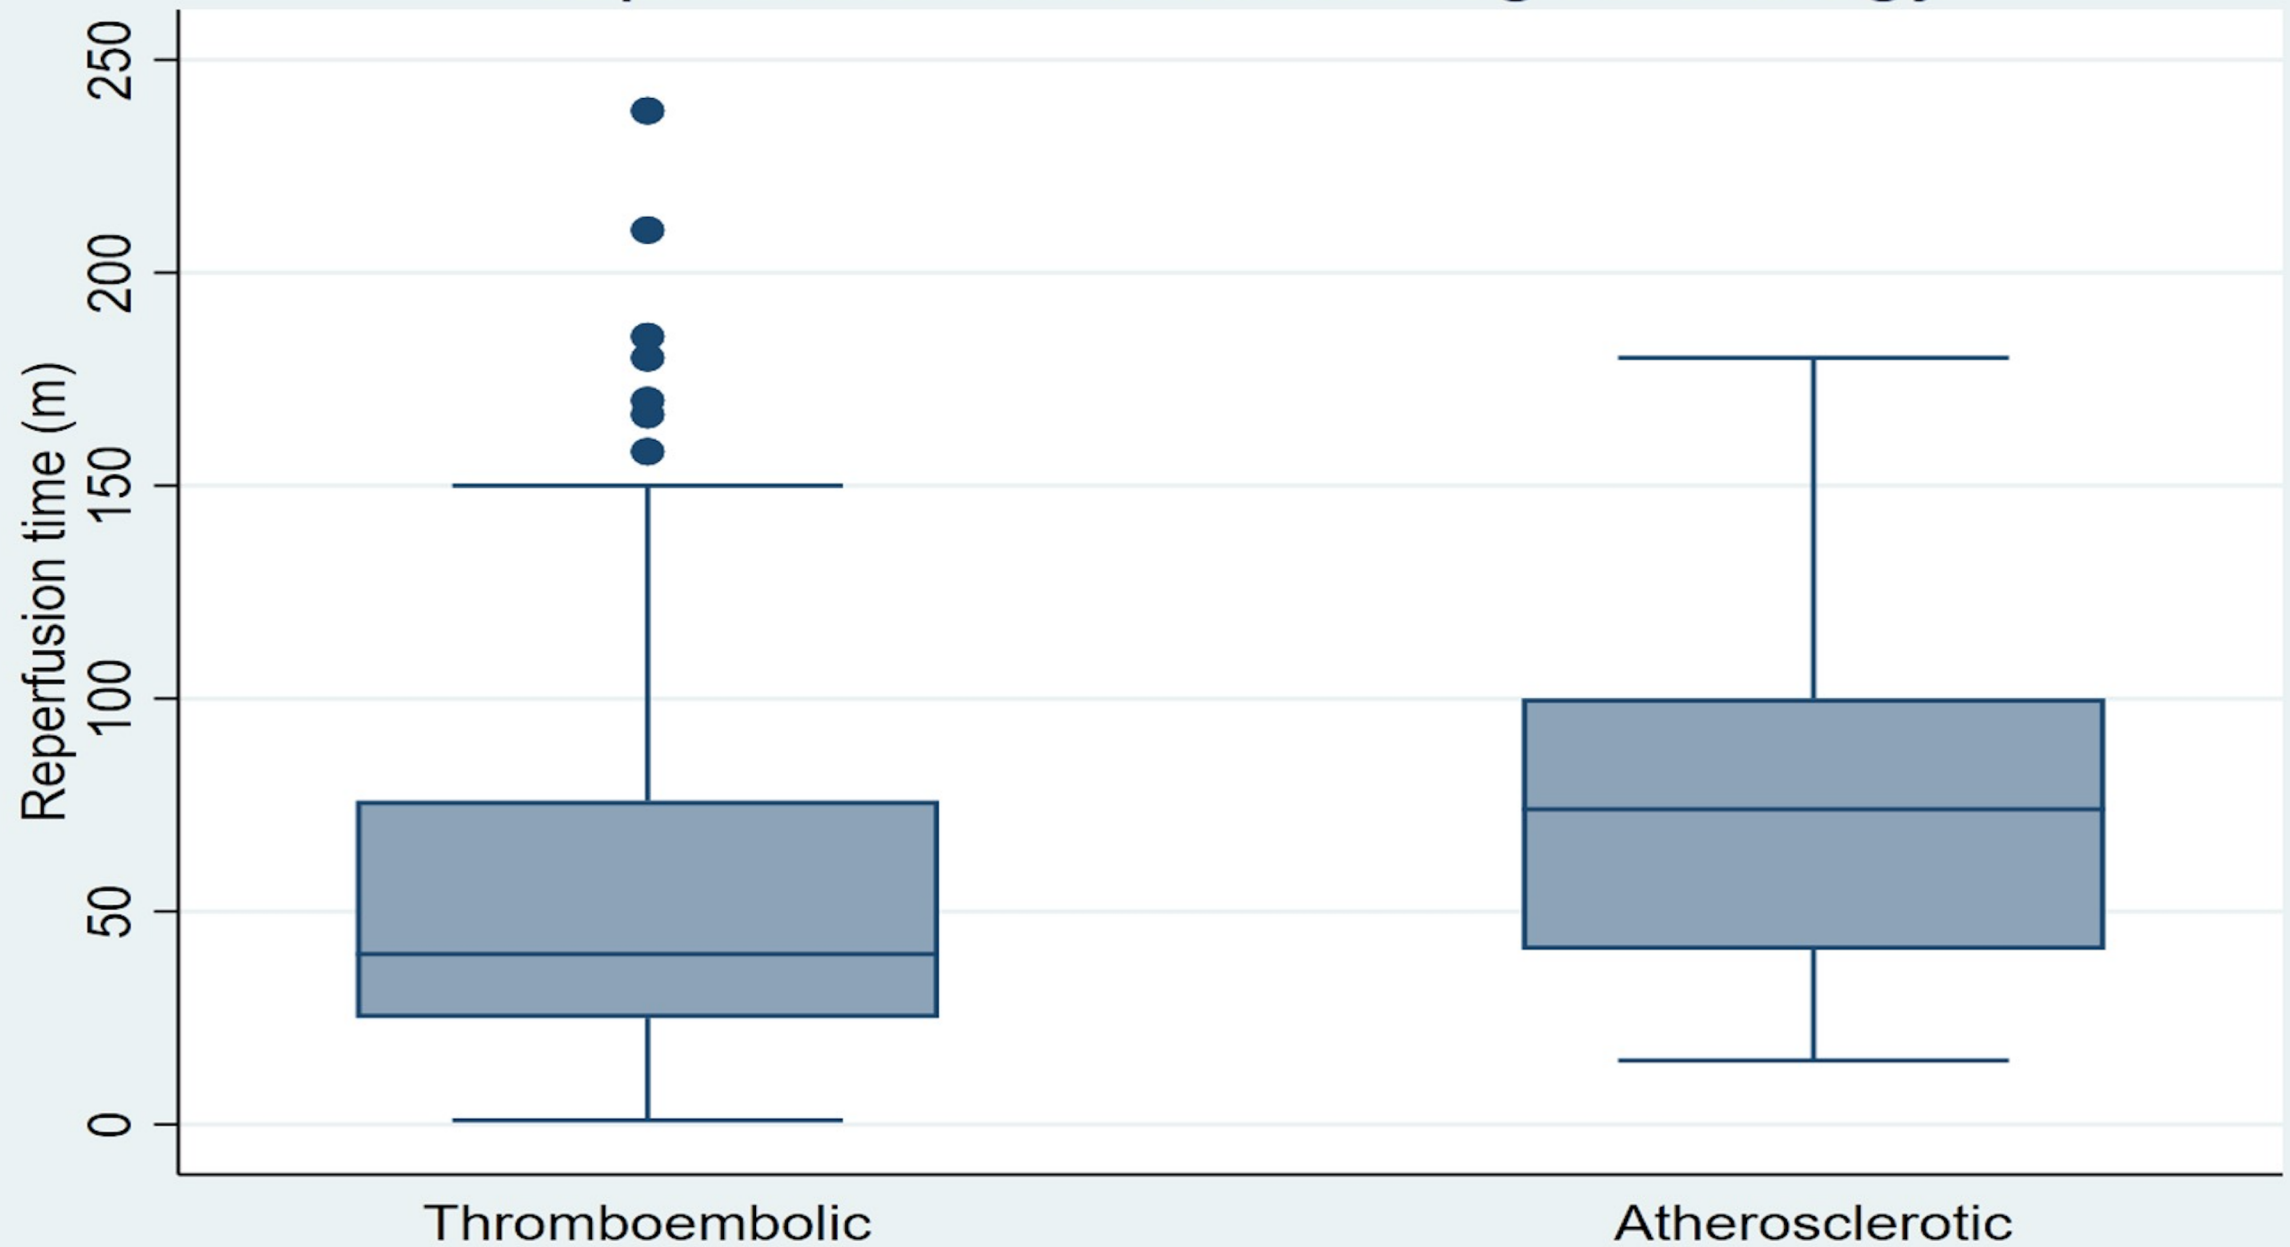

## **Legends**

### **Supplement 1**

Type of complications.

PH= Parenchymal hematoma (including PH1 and PH2 according to Heidelberg Classification);

aSAH= asymptomatic subarachnoid hemorrhage; BA=Basilar Artery; VA= Vertebral Artery.

### **Supplement 2A 2B**

Uni- and multivariate subgroup analysis of the atherosclerotic etiology with 90 days favorable outcome as dependent variable.

### **Supplement 3**

Frequency of successful reperfusion according to MRI pc-ASPECTS.

### **Supplement 4**

Reperfusion time in consideration to presumed stroke's etiology. Reperfusion time was significantly lower in thromboembolic etiology ( $p<0.001$ ).
